# Cells use molecular working memory to navigate in changing chemoattractant fields

Akhilesh Nandan<sup>1,2,†</sup>, Abhishek Das<sup>1,2,†</sup>, Robert Lott<sup>2</sup> and Aneta Koseska<sup>1,2,\*</sup>

<sup>1</sup> Department of Systemic Cell Biology, Max Planck Institute of Molecular Physiology,  
Otto-Hahn-Str.11, 44227 Dortmund, Germany

<sup>2</sup> Current address: Cellular Computations and Learning,  
Center of Advanced European Studies and Research (Caesar), Ludwig-Erhard-Allee 2, 53175 Bonn, Germany

<sup>†</sup>These authors contributed equally.

\*To whom correspondence should be addressed; E-mail: [aneta.koseska@caesar.de](mailto:aneta.koseska@caesar.de)

## Abstract

In order to migrate over large distances, cells within tissues and organisms rely on sensing local gradient cues. These cues however are multifarious, irregular or conflicting, changing both in time and space. Here we find that single cells utilize a molecular mechanism akin to a working memory, to generate persistent directional migration when signals are disrupted by temporally memorizing their position, while still remaining adaptive to spatial and temporal changes of the signal source. Using dynamical systems theory, we derive that these information processing capabilities are inherent for protein networks whose dynamics is maintained away from steady state through organization at criticality. We demonstrate experimentally using the Epidermal growth factor receptor (EGFR) signaling network, that the memory is maintained in the prolonged receptor's activity via a slow-escaping remnant, a dynamical "ghost" of the

attractor of the polarized signaling state, that further results in memory in migration. As this 12  
state is metastable, it also enables continuous adaptation of the migration direction when the 13  
signals vary in space and time. We therefore show that cells implement real-time computations 14  
without stable-states to navigate in changing chemoattractant fields by memorizing position of 15  
disrupted signals while maintaining sensitivity to novel chemical cues. 16

## Introduction 17

Directed chemotactic behavior relies on generating polarized signaling activity at the plasma 18  
membrane of the cell that is translated to an elongated cell shape in the direction of the signal. 19  
Cells maintain the acquired orientation longer than the duration of the recently encountered 20  
signal in order to avoid immediate switching to random migration when signals are temporarily 21  
disrupted or noisy, while simultaneously remaining sensitive and are able to adapt the migration 22  
direction based on the changes in the environment (Parent and Devreotes, 1999; Foxman et al., 23  
1999; Ridley et al., 2003). Thus, cells as diverse as social amoeba, neutrophils, leukocytes, fi- 24  
broblasts and nerve cells, not only respond to dynamic gradients, but also integrate and resolve 25  
competing spatial signals or prioritize newly encountering attractants, likely by memorizing 26  
their recent environment (Jilkine and Edelstein-Keshet, 2011; Skoge et al., 2014; Albrecht and 27  
Petty, 1998). Numerous models of chemotactic responses based on positive feedbacks, inco- 28  
herent feed-forward, excitable or Turing-like networks have been proposed, accounting either 29  
for sensing non-stationary stimuli or for long-term maintenance of polarized signaling activity, 30  
but not both (Levchenko and Iglesias, 2002; Levine et al., 2002; Mori et al., 2008; Goryachev 31  
and Pokhilko, 2008; Beta et al., 2008; Xiong et al., 2010; Trong et al., 2014; Halatek and Frey, 32  
2018). These models rely on computations with stable states, where switching from the at- 33  
tractor of basal- to the attractor of polarized-signaling activity enables noise-robust sensing, 34  
or establishing a long-term memory of previous signal localization. However, they are less 35

suites for real-time computation of signals that vary in time and space, since the stable attractors completely hinder or at least significantly delay the responsiveness to newly encountered signals (Stanoev et al., 2020). Thus, the mechanism that underlies robust cellular navigation in changing chemical fields has remained unknown.

Here we set out to identify how cells satisfy these two general, but seemingly opposed demands: maintaining temporal memory in directional migration through a prolonged polarized state beyond the chemotactic signal duration, while still being able to quickly reset and re-adapt upon novel sensory cues. Using a mathematical model of EGFR network signaling dynamics, we predict and demonstrate experimentally in epithelial cells that these competing demands are uniquely fulfilled for network's organization at criticality. Beyond this specific biological implementation, we present a generic dynamical mechanism that addresses how cells compare and integrate chemical cues over time and space in order to generate robust responses in a history-dependent manner.

## Results

49

### 1 Dynamical basis of navigation in non-stationary environments

50

51

We conjectured that operating in changing environments likely relies on computations with metastable states rather than stable attractors, to allow both for transient stability of the polarized signaling state when signals are disrupted or noisy, as well as its rapid adaptation when the signals vary in space and time. Our hypothesis is that this can be achieved if biochemical systems are maintained away from steady state. We therefore approached the problem using the abstract language of dynamical systems theory, where the characteristics of any process directly follow from the type of dynamical transitions, called bifurcations, through which they emerge (Strogatz, 2018). In our previous work we identified that when a saddle-node bifurcation (*SN*) and thereby a steady-state is lost in a dynamical transition, i.e. upon signal removal, a remnant or a dynamical "ghost" of the stable attractor serves as a mechanism for sensing time-varying growth factors in biochemical receptor networks (Stanoev et al., 2018; Stanoev et al., 2020). Necessary for manifestation of the "ghost" state is organization at criticality, which in the networks we previously examined was determined by the concentration of receptors on the cell membrane. Moreover, the "ghost" state is dynamically metastable and transiently maintains the system in the vicinity of the steady state. Thus, a transient memory of previously present stimuli is generated, which enables integration of information contained in the temporal signals. Navigation in changing environments through directed migration however, must additionally rely on a polarized representation of the directional signal, requiring a reliable mechanism for signal-induced transition from a non-polarized symmetric to an asymmetric polarized receptor signaling state and subsequently polarized cell shape. From a dynamical systems point of view, a pitchfork bifurcation (*PB*) can satisfy the condition for robust cell polarization, since

52

53

54

55

56

57

58

59

60

61

62

63

64

65

66

67

68

69

70

71

72

by definition a *PB* characterizes a transition from a homogeneous to an inhomogeneous steady state (Koseska et al., 2013; Strogatz, 2018). We thus hypothesized that organization at criticality - in the vicinity of a  $SN_{PB}$  through which a sub-critical *PB* is stabilized (grey shaded area in Figure 1A), the dynamical characteristics of both bifurcations, signal integration through dynamic memory and cell polarization, will be uniquely manifested to render a minimal mechanism for responsiveness in changing environments.

We described this conjecture mathematically for a general reaction-diffusion model representing the signaling activity on the plasma membrane of a cell,  $\frac{\partial \mathbf{U}(\mathbf{x}, t)}{\partial t} = \mathbf{F}(\mathbf{U}) + \mathbf{D} \nabla^2 \mathbf{U}(\mathbf{x}, t)$ , with  $\mathbf{U}$  being the vector of local densities of active signaling components,  $\mathbf{D}$  - diffusion constants and  $\mathbf{F}$  accounting for all chemical reactions. Our analysis shows that a *PB* exists if, for a spatial perturbation of the symmetric steady state ( $\mathbf{U}_s$ ) of the form  $\mathbf{U}(\mathbf{x}, t) = \mathbf{U}_s + \delta \mathbf{U}(\mathbf{x}) e^{\lambda t}$ , the conditions  $\delta \mathbf{U}(-\mathbf{x}) = -\delta \mathbf{U}(\mathbf{x})$  and the limit  $\lim_{\lambda \rightarrow 0} F_\lambda = \det(J) = 0$  are simultaneously fulfilled (Supplementary information). This implies that the linearized system has zero-crossing eigenvalues ( $\lambda$ ) associated with the odd mode of the perturbation (Paquin-Lefebvre et al., 2020). To probe the sub-critical transition and therefore the necessary organization at criticality, a reduced description in terms of an asymptotic expansion of the amplitude of the polarized state ( $\phi$ ) must yield the Landau equation  $\frac{d\phi}{dt} = c_1 \phi + c_2 \phi^3 - c_3 \phi^5$ , guaranteeing the existence of  $SN_{PB}$  (see Supplementary information for derivation).

These abstract dynamical transitions can be realized in receptor tyrosine kinase signaling networks with different topologies and are best analyzed using computational models, whose predictions are then tested in quantitative experiments on living cells. To exemplify the above mentioned principle, we use the well-characterized Epidermal growth factor receptor (EGFR) sensing network (Reynolds et al., 2003; Baumdick et al., 2015; Stanoev et al., 2018). It constitutes of double negative and negative feedback interactions of the receptor, EGFR ( $E_p$ ) with two enzymes, the phosphatases PTPRG ( $P_{RG}$ ) and PTPN2 ( $P_{N2}$ ; Figure 1B, Figure S1A), re-

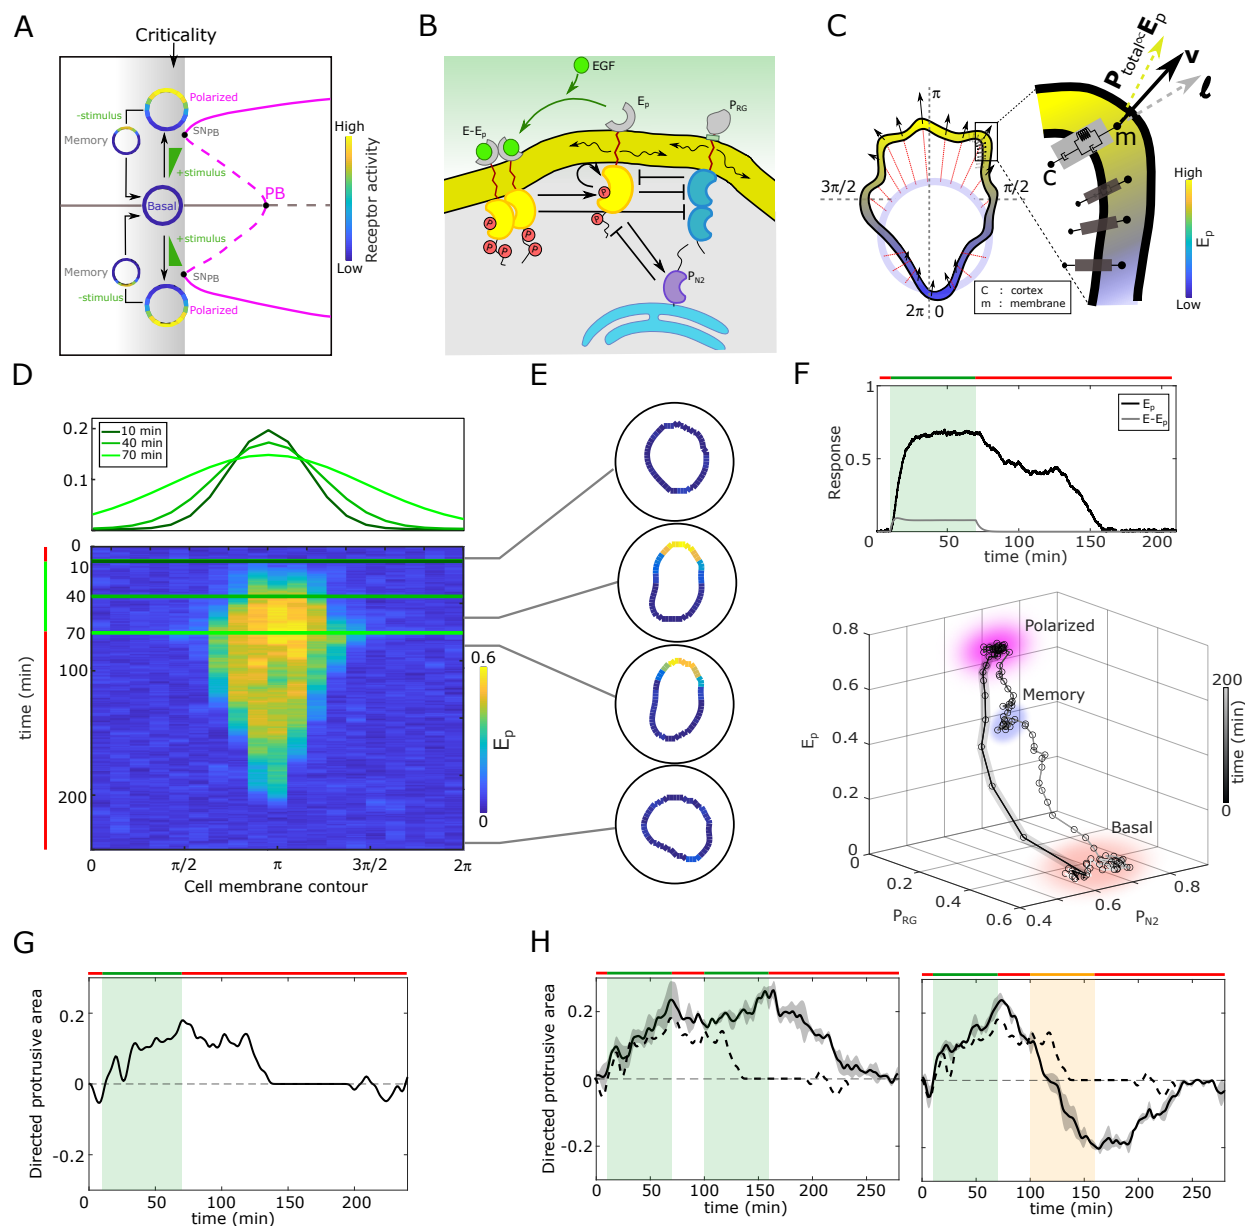

**Figure 1. Organization at criticality enables sensing changing spatial-temporal signals.** **A**, Dynamical mechanism: critical organization before sub-critical pitchfork bifurcation ( $PB$ , grey shaded area). Stable/unstable steady states (solid/dashed lines): basal (homogeneous, grey) and polarized (inhomogeneous, magenta) receptor activity; stimulus induced transitions between states: arrow lines.  $SN_{PB}$ : saddle-node bifurcation through which  $PB$  is stabilized.

**B**, Scheme of the EGFR-PTP interaction network. Ligandless EGFR ( $E_p$ ) interacts with PT-PRG ( $P_{RG}$ ) and PTPN2 ( $P_{N2}$ ). Liganded EGFR ( $E - E_p$ ) promotes autocatalysis of  $E_p$ . Causal links: solid black lines; curved arrow lines: diffusion. See also Figure S1A. **C**, Signal-induced shape-changes during cell polarization. Arrows: local edge velocity direction. Zoom: Viscoelastic model of the cell - parallel connection of an elastic and a viscous element.  $\mathbf{P}_{total}$ : total pressure;  $\mathbf{v}$ : local membrane velocity;  $\mathbf{I}$ : viscoelastic state. Bold letters: vectors. Cell membrane contour:  $[0, 2\pi]$ . **D**, Top: *In silico* evolution of spatial EGF distribution. Bottom: Kymograph of  $E_p$  for organization at criticality from reaction-diffusion simulations of the network in (**B**). **E**, Corresponding exemplary cell shapes with color coded  $E_p$ , obtained with the model in (**C**). **F**, Top: Temporal profiles  $E_p$  (black) and  $E - E_p$  (grey). Green shaded area: EGF gradient presence. Bottom: State-space trajectory of the system with denoted trapping state-space areas (colored). See also movie S1. Thick/thin line: signal presence/absence. **G**, Quantification of *in silico* cell morphological changes from the example in **E**. **H**, Left: same as in **G**, only when stimulated with two consecutive dynamic gradients from same direction. Second gradient within the memory phase of the first. Right: the second gradient (orange) has opposite localization. Mean $\pm$ s.d. from n=3. See also Figure S1C,D. Dashed line: curve from **G**. Parameters: Supplementary information. In (**D-H**), green(orange)/red lines: stimulus presence/absence. See also Figure S1.

spectively.  $E_p$  and  $P_{RG}$  laterally diffuse on the membrane and inhibit each-other's activities 98  
(see Supplementary information for the molecular details of the network). These molecular 99  
interactions can be mathematically described using mass action kinetics (Eqs.(6) in Supple- 100  
mentary information), and a weakly nonlinear analysis (Becherer et al., 2009) shows that the 101  
EGFR signaling dynamics undergoes a symmetry-breaking transition as outlined above (proof 102  
in Supplementary information, Figure S1B). Contrary to a bistable system, where the polarized 103  
signaling state would be manifested by two steady states, for e.g. high and low protein phos- 104  
phorylation in the front and back of the cell respectively (Beta et al., 2008), the inhomogeneous 105  
steady state generated via a  $PB$  is a single attractor defined as a combination of the front and 106  
back activity states. This profiles  $PB$  as a robust mechanism of cell polarization. 107

Polarized EGFR signaling on the other hand, will lead to reorganization of the cortical 108  
actomyosin cytoskeleton by regulating members of the Rho GTPase family, thereby induc- 109  
ing signal-dependent cell shape changes and subsequent migration (Chiasson-MacKenize and 110

McClatchey, 2018; Ridley and Hall, 1992). In order to link signaling activity with morpho- 111  
dynamics, we modeled the cell as a viscoelastic cortex surrounding a viscous core (Yang 112  
et al., 2008) (Supplementary information), where EGFR signaling dynamics affects cell shape 113  
changes through the protrusion/retraction stress and the viscoelastic nature of the cell membrane 114  
(Figure 1C). 115

We first fixed the total EGFR concentration on the cell membrane to a value that corresponds 116  
to organization at criticality, and investigated the response of the *in silico* cell to gradient stim- 117  
ulus. In the absence of stimulus, EGFR phosphorylation is uniformly distributed along the cell 118  
membrane rendering a symmetrical cell shape (Figure 1D, E). Introducing dynamic gradient 119  
stimulus in the simulation (slope changes from steep to shallow over time, Figure 1D, top) led 120  
to rapid polarization of EGFR phosphorylation in the direction of the maximal chemoattrac- 121  
tant concentration, generating a cell shape with a clear front and back. The polarized signaling 122  
state was maintained for a transient period of time after removal of the gradient, corresponding 123  
to manifestation of memory of the localization of the previously encountered signal (Figures 124  
1D,E; temporal profile Figure 1F, top). The prolonged polarized state does not result from rem- 125  
nant ligand-bound receptors ( $E - E_p$ ) on the plasma membrane, as they exponentially decline 126  
after signal removal (Figure 1F, top). The memory in polarized signaling was also reflected on 127  
the level of the cell morphology, as shown by the difference of normalized cell protrusion area 128  
in the front and the back of the cell over time (Figure 1G). Plotting the trajectory that describes 129  
the change of the state of the system over time (state-space trajectory, Figure 1F bottom, movie 130  
S1) shows that the temporal memory in EGFR phosphorylation polarization is established due 131  
to transient trapping of the signaling state trajectory in state-space. This is typical for the emer- 132  
gence of metastable "ghost" states (Stanoev et al., 2020; Strogatz, 2018), indicating that the 133  
system is maintained away from steady-states. The trapping in the dynamically-metastable 134  
memory state does not hinder sensing of and adapting to subsequent signals. The cell polar- 135



ity is sustained even when the EGF signal is briefly disrupted, and the cell is able to reverse 136  
direction of polarization when the signal direction is inverted (Figure 1H, Figures S1C,D). We 137  
next chose in the simulations a higher EGFR concentration on the membrane, such that the 138  
system moves from criticality to organization in the stable inhomogeneous state regime. In this 139  
scenario, even a transient signal induces switching to the polarized state that is permanently 140  
maintained, generating a long-term memory of the direction on the initial signal. Thus, the 141  
cell is insensitive to subsequent stimuli from the same direction, whereas consecutive gradients 142  
from opposite directions generate conflicting information that cannot be resolved (Figure S1E). 143  
Organization in the homogeneous, symmetric steady states on the other hand renders cells in- 144  
sensitive to the extracellular signals (Figure S1F,G). These response features for organization 145  
in the stable steady state regimes resemble the finding of previously published models: such 146  
models cannot simultaneously capture memory in polarization along with continuous adapta- 147  
tion to novel signals, or require fine-tuning of kinetic parameters to explain the experimentally 148  
observed cell behavior (Levchenko and Iglesias, 2002; Levine et al., 2002; Mori et al., 2008; 149  
Goryachev and Pokhilko, 2008; Beta et al., 2008; Xiong et al., 2010; Trong et al., 2014). This 150  
demonstrates that organization at criticality, in a vicinity of a  $SN_{PB}$ , is a unique mechanism for 151  
processing changing signals. 152

## 2 Cells display temporal memory in polarized receptor phos- 153 phorylation resulting from a dynamical "ghost" 154

To test experimentally whether cells maintain memory of the direction of previously encoun- 155  
tered signals and what is the duration of this effect, epithelial breast cancer-derived MCF7 156  
cells were subjected for 1h to a stable gradient of fluorescently tagged EGF-Alexa647 (EGF<sup>647</sup>) 157  
with a maximal amplitude of 10ng/ml applied from the top of the chamber in a computer- 158  
programmable microfluidic device (Figures 2A,B). EGFR phosphorylation at the plasma mem- 159

brane was quantified during and for 3h after gradient wash-out by determining the rapid translo- 160  
cation of mCherry-tagged phosphotyrosine-binding domain (PTB<sup>mCherry</sup>) to phosphorylated 161  
tyrosines 1086/1148 of ectopically expressed EGFR-mCitrine (EGFR<sup>mCitrine</sup>) using ratiomet- 162  
ric imaging (Offterdinger et al., 2004)(Methods). Due to the low endogenous EGFR levels in 163  
MCF7 cells, the expression range of EGFR<sup>mCitrine</sup> was set to mimic the endogenous receptor 164  
range in the related MCF10A cell line, such that both cell lines have equivalent signaling prop- 165  
erties of downstream effector molecules (Stanoev et al., 2018), and were therefore used in a 166  
complementary way in this study. 167

Kymograph analysis of EGFR<sup>mCitrine</sup> phosphorylation at the plasma membrane of sin- 168  
gle cells showed polarization in gradient of EGF<sup>647</sup> (Figure 2C, Figures. S2A-D), as shal- 169  
low as 10% between front and back of the cell. Only few cells manifested basal or sym- 170  
metric EGFR<sup>mCitrine</sup> phosphorylation distribution upon gradient stimulation (Figures S2A- 171  
B,E). Quantifying the fraction of plasma membrane area with polarized EGFR<sup>mCitrine</sup> phos- 172  
phorylation revealed that the polarization persisted  $\sim 40min$  on average after gradient re- 173  
moval ( $[4 - 159min]$  Figures 2D,E; Figure S2F). In order to identify whether the experi- 174  
mentally observed memory results from a dynamically metastable (transiently stable) signal- 175  
ing state, we next reconstructed the state-space trajectory from the measured single-cell tem- 176  
poral EGFR<sup>mCitrine</sup> phosphorylation profile using Takens's delay embedding theorem (Takens, 177  
1980)(Methods). Trajectory trapping in a state-space area different than that of the polar- 178  
ized and basal steady states characterized the memory phase, corroborating that the memory 179  
in EGFR<sup>mCitrine</sup> phosphorylation polarization emerges from a  $SN_{PB}$  "ghost" that maintains 180  
the system away from the steady-states (compare Figure 2F to 1F, movie S2). Although the 181  
memory doesn't result from a stable state, it enables to maintain memory of the polarized cell 182  
morphology even after gradient removal. This is reflected through the exemplary temporal 183  
evolution of the cell protrusion area in direction of the gradient (Figure 2G, memory duration 184

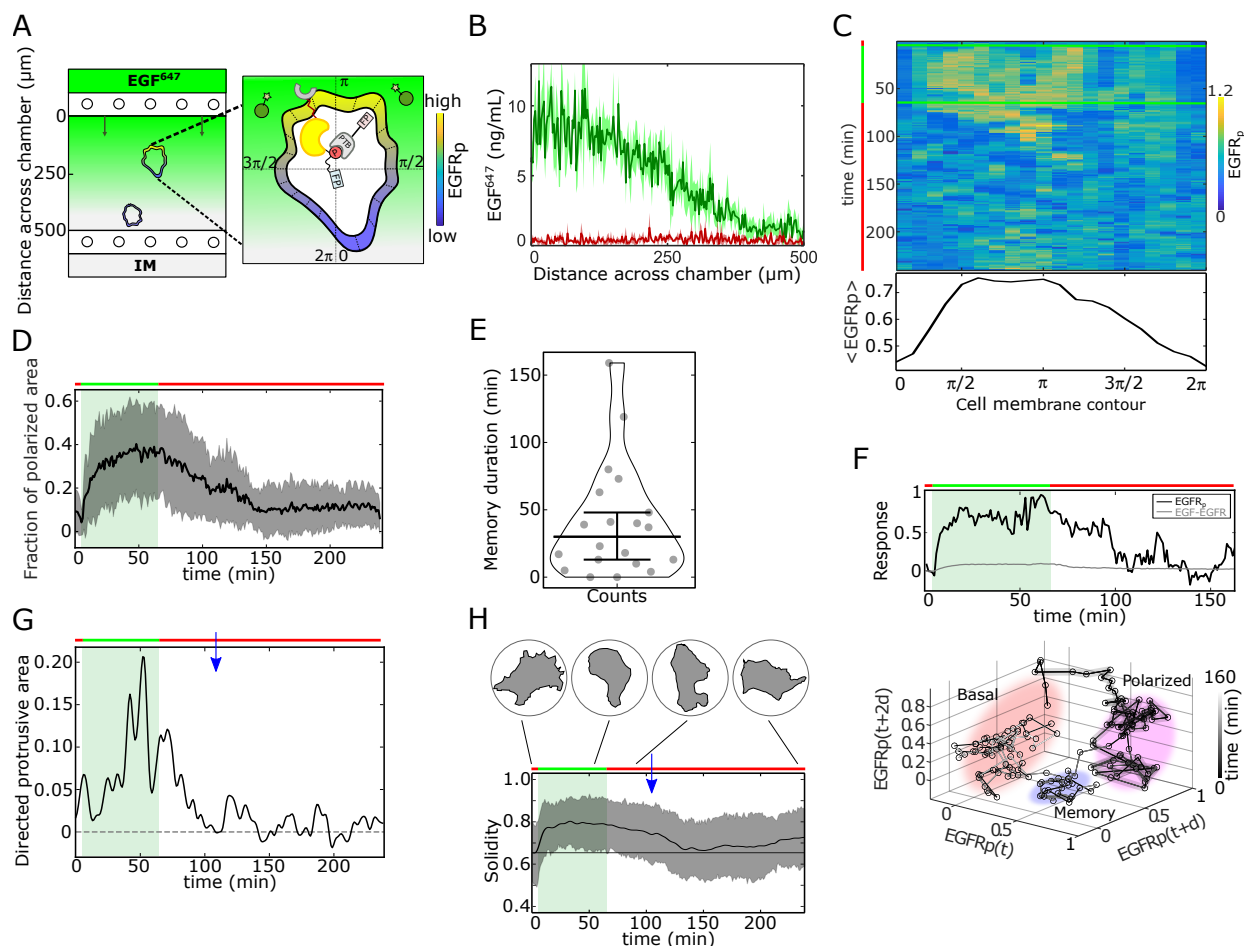

**Figure 2. Single-cell molecular memory in polarized  $EGFR^{mCitrine}$  phosphorylation from dynamical state-space trapping.** **A**, Scheme of microfluidic  $EGF^{647}$ -gradient experiment; Zoom: single-cell measurables. Cell membrane contour  $[0, 2\pi]$  (20 segments). *PTB* - phosphotyrosine binding domain, *FP*/star symbol - fluorescent protein,  $EGFR_p$  - phosphorylated  $EGFR^{mCitrine}$ . Remaining symbols as in Figure 1B. **B**, Quantification of  $EGF^{647}$  gradient profile (at 60min, green) and after gradient wash-out (at 65min, red). Mean $\pm$ s.d.,  $N=4$ . **C**, Exemplary quantification of, Top: single-cell  $EGFR_p$  kymograph. Data was acquired at 1min intervals in live MCF7- $EGFR^{mCitrine}$  cells subjected for 60min to an  $EGF^{647}$  gradient. Other examples in Figure S2D. Bottom: respective spatial projection of  $EGFR_p$ . Average using a moving window of 7 bins is shown. Mean $\pm$ s.d. from  $n=20$ ,  $N=7$  in Figure S2C. **D**, Average fraction of polarized plasma membrane area (mean $\pm$ s.d.). In **D**, **E** and **H**,  $n=20$ ,  $N=7$ . **E**, Quantification of memory duration in single cells (median $\pm$ C.I.). **F**, Top: Temporal profiles of phosphorylated  $EGFR^{mCitrine}$  (black) and  $EGF^{647} - EGFR^{mCitrine}$  (grey) corresponding to **C**. Bottom: Corresponding reconstructed state-space trajectory (movie S2) with denoted trapping state-space areas (colored). Thick/thin line: signal presence/absence.  $d$  - embedding time delay.

**G**, Exemplary quantification of morphological changes, directed cell protrusion area, for the cell in **C**. Memory duration:  $43min$ . **H**, Averaged single-cell morphological changes (Solidity,  $mean \pm s.d.$ ). Average memory duration:  $40min$ . Top insets: representative cell masks at distinct time points. In **D**, **F-H**, green shaded area: EGF<sup>647</sup> gradient duration; green/red lines: stimulus presence/absence. Blue arrow: end of memory. See also Figure S2.

$\sim 43min$ ). On average, single epithelial cells maintained the polarized cell shape  $\sim 40min$  185  
after signal removal (Figure 2H, Methods). The average duration of memory in the polarized 186  
cell morphology therefore directly corresponds to the average memory duration in signaling, 187  
suggesting that it will be also reflected as memory in directed cell migration. 188

### 3 Transient memory in cell polarization is translated to transient memory in directional migration 189 190

To test the phenotypic implications of the transient memory in cell polarization, we analyzed 191  
the motility features of the engineered MCF7-EGFR<sup>mCitrine</sup>, as well as of MCF10A cells at 192  
physiological EGF concentrations. Cells were subjected to a 5h dynamic EGF<sup>647</sup> gradient that 193  
was linearly distributed within the chamber, with EGF<sup>647</sup> ranging between 25–0ng/ml, allowing 194  
for optimal cell migration (Figure S3A). The gradient steepness was progressively decreased 195  
in a controlled manner, rendering an evolution towards a  $\sim 50\%$  shallower gradient over time 196  
(Figure S3B). Automated tracking of single-cell's motility trajectories was performed for 14h in 197  
total. MCF7-EGFR<sup>mCitrine</sup>, as well as MCF10A cells migrated in a directional manner towards 198  
the EGF<sup>647</sup> source (Figure 3A- and Figure S3C,D - left, green trajectory parts). This directed 199  
migration persisted for transient period of time after the gradient wash-out (Figure 3A- and 200  
Figure S3C,D - left, red trajectory parts, movie S3), indicating that cells maintain memory of 201  
the location of previously encountered source. After the memory phase, the cells transitioned 202  
to a migration pattern equivalent to that in the absence of a stimulus (Figure 3A right, Figures 203  
S3C,D middle). Uniform stimulation with 20ng/ml EGF<sup>647</sup> did not induce directed migration 204

in either of the cell lines, although the overall migration distance was increased (Brueggemann 205  
et al., 2021) (Figures S3C,D, right). Quantification of the directionality of single cells' motion, 206  
that is defined as the displacement over travelled distance, showed that for MCF10A cells it 207  
was significantly higher during the gradient stimulation (5h) as compared to no- or uniform- 208  
stimulation case (Figure 3B). Moreover, the directionality estimated in the 9h time-frame after 209  
the gradient removal was greater than the one in continuous stimulus absence, corroborating 210  
that cells transiently maintain memory of the previous direction of migration. 211

This was also reflected in the projection of the cell's relative turning angles ( $\cos \theta$ ) esti- 212  
mated along the gradient direction ( $\pi$ ) at each time point (Figure S4A), representing the angular 213  
alignment of the cells to the source direction. The cellular migration trajectories aligned with 214  
the source direction ( $\cos \theta$  approached 1) during, and maintained this temporally after gradient 215  
removal, before returning to a migration pattern characteristic for stimulus absence or during 216  
uniform stimulation ( $\cos \theta \approx 0$ , Figure 3C top, Figure S4B). Calculating the similarity between 217  
the Kernel Density distribution Estimate (KDE) of the angular alignment distributions at each 218  
point in the gradient series with that in continuous stimulus absence, showed that the distri- 219  
butions approach each other only  $\sim 50min$  after the gradient removal (Figure 3C, bottom). 220  
Additionally, the calculated similarity between the KDE distributions during the gradient (5h) 221  
and the  $50min$  memory period further corroborated this finding (Figure S4C). The average 222  
memory phase in directional motility thus corresponds to the time-frame in which the memory 223  
in polarized EGFR<sup>mCitrine</sup> phosphorylation and cell shape is maintained (Figures 2C-H), indi- 224  
cating that the metastable signaling state is translated to a stable prolonged migration response 225  
after gradient removal. 226

To investigate whether the motility patterns during the gradient and the memory phase have 227  
equivalent characteristics, we fitted the motility data using a modified Ornstein-Uhlenbeck pro- 228  
cess (Uhlenbeck and Ornstein, 1930; Svensson et al., 2017) and used the extracted migration 229

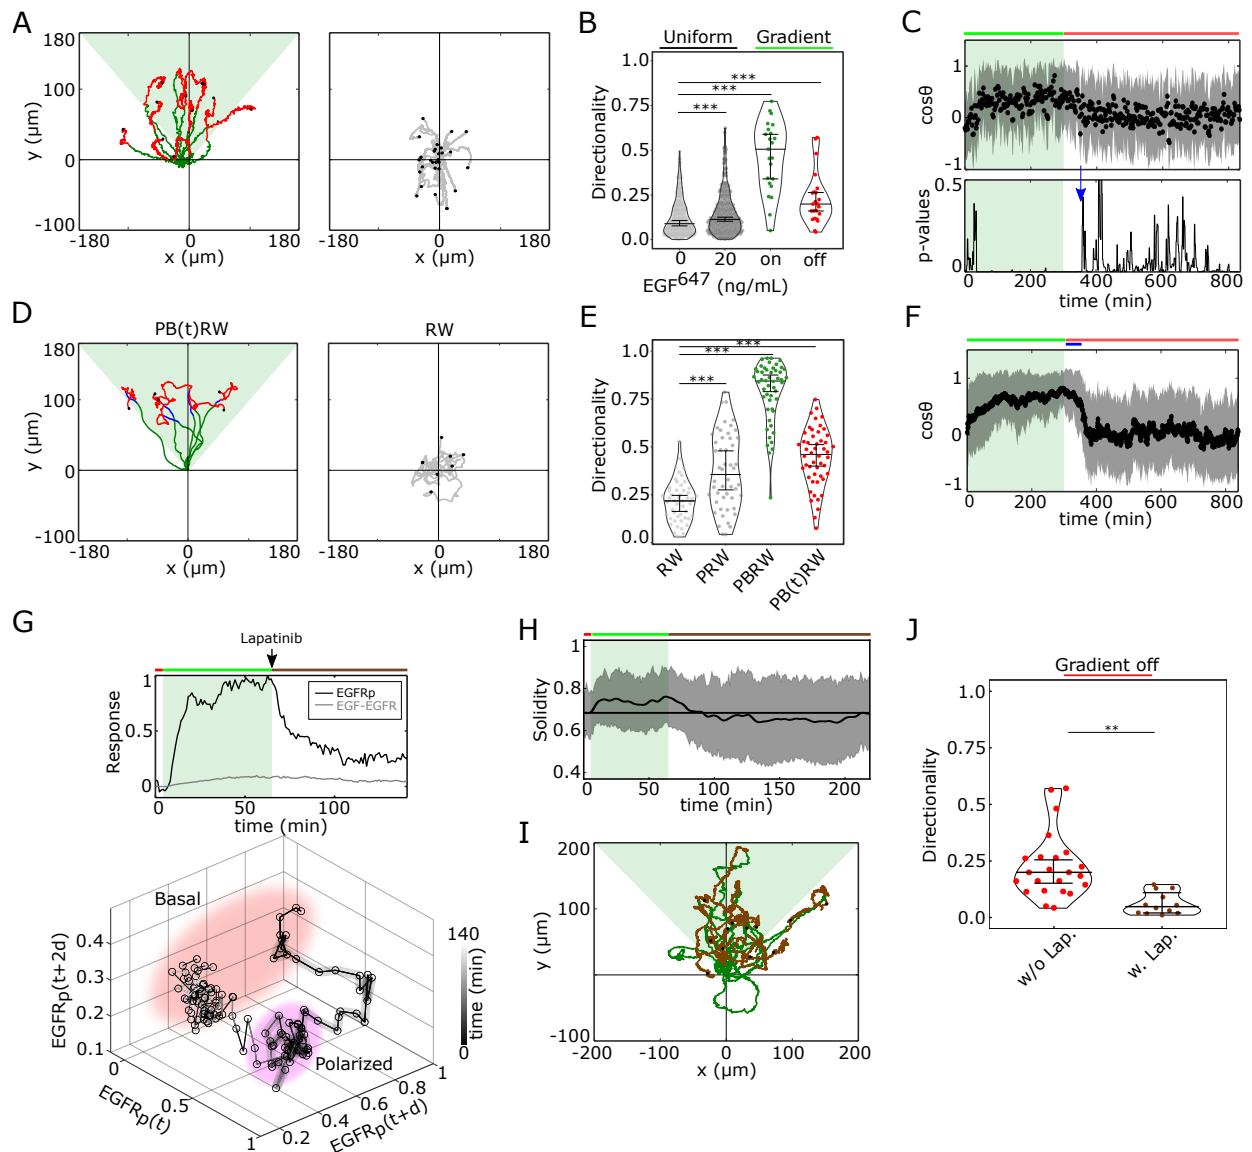

**Figure 3. Cells display memory of recently encountered signals.** A, Left: representative MCF10A single-cell trajectories. Green - 5h during and red line - 9h after dynamic EGF<sup>647</sup> gradient (shaded). Exemplary cell in movie S3. Right: Same as in A, only 14h in continuous EGF<sup>647</sup> absence. Black dots: end of tracks.

**B**, Directionality (displacement/distance) in MCF10A single-cell migration during 14h absence (0ng/ml; n=249, N=3) or uniform 20ng/ml EGF<sup>647</sup> stimulation (n=299, N=3); 5h dynamic EGF<sup>647</sup> gradient (green) and 9h during wash-out (red; n=23, N=5). p-values: \*\*\*  $p \leq 0.001$ , two-sided Welch's t-test. Error bars: median $\pm$ 95%C.I. **C**, Top: Projection of the cells' relative turning angles (mean $\pm$ sd; n=23, N=5) during (green shaded) and after 5h dynamic EGF<sup>647</sup> gradient. Green/red lines: stimulus presence/absence. Bottom: Kolmogorov-Smirnov (KS) test p-values depicting end of memory in directional migration (arrow,  $t = 350min$ ). KS-test estimated using 5 time points window. For A-C, data sets in Figures S3D, S4A-C. **D**, Representative *in silico* single-cell trajectories (Methods). Left: PB(t)RW: Persistent biased random walk, bias is a function of time (green/blue trajectory part - bias on). Right: RW: random walk. **E**, Corresponding directionality estimates from n=50, data in Figure S4D. PRW: persistent random walk. p-values: \* \* \*  $p \leq 0.001$ , two-sided Welch's t-test. Error bars: median $\pm$ 95%C.I. **F**, Same as in **C**, only from the synthetic PB(t)RW trajectories. **G**, Top: Exemplary profiles of  $EGFR_p$  (black) and  $EGF - EGFR$  (grey) in live MCF7-EGFR<sup>mCitrine</sup> cell subjected to 1h EGF<sup>647</sup> gradient (green shading), and 4h after wash-out with 1  $\mu$ M Lapatinib. Mean $\pm$ s.d. from n=9, N=2 in Figure S4H. Bottom: Corresponding reconstructed state-space trajectory with state-space trapping (colored) (Methods. movie S4). **H**, Average solidity in MCF7-EGFR<sup>mCitrine</sup> cells subjected to experimental conditions as in **G**. Mean $\pm$ s.d. from n=9, N=2 cells. **I**, MCF10A single-cell trajectories quantified 5h during (green) and 9h after (orange) dynamic EGF<sup>647</sup> gradient (shading) wash-out with 3  $\mu$ M Lapatinib. n=12, N=5. See also movie S5. **J**, Directionality in single-cell MCF10A migration after gradient wash-out with (brown, n=12, N=5) and without Lapatinib (red, n=23, N=5). p-values: \*\*  $p \leq 0.01$ , KS-test. Error bars: median $\pm$ 95%C.I. See also Figures S3 and S4.

parameters to generate synthetic single-cell trajectories (Methods). In absence of stimulus, the 230  
cellular motion resembled a random walk process (RW: Figure 3D right, Figures S4D,E mid- 231  
dle), persistent random walk (PRW) was characteristic for the uniform stimulation case (Figure 232  
S4D, E right), whereas biased PRW described the migration in gradient presence (PBRW, Fig- 233  
ure 3D- and Figure S4D, left, green trajectory part). Extending the bias duration during the 234  
interval of the experimentally observed memory phase (PB(t)RW) was necessary to reproduce 235  
the transient persistent motion after gradient removal (Figure 3D- and Figure S4D, left, blue 236  
trajectory part; Figures 3E,F; Figure S4F). Altogether, these results demonstrate that epithelial 237  
cells transiently maintain a memory of previous signal location and thereby display directed 238  
motility equivalent to that in the presence of a gradient, before reverting to a random walk 239  
migration pattern. 240



To corroborate the link between memory in polarized receptor activity and memory in directional migration, we quantified EGFR<sup>mCitrine</sup> phosphorylation polarization in the MCF7-EGFR<sup>mCitrine</sup>, as well as directional migration of MCF10A cells, when cells were subjected to an ATP analog EGFR inhibitor Lapatinib (Bjorkelund et al., 2012) during gradient wash-out. The exemplary single-cell kymograph and EGFR<sup>mCitrine</sup> phosphorylation temporal profile demonstrate that the phosphorylation response exponentially decays upon Lapatinib addition, resulting in a clear absence of transient memory in EGFR<sup>mCitrine</sup> phosphorylation polarization (Figure 3G top, Figures S4G,H). This is further reflected in the reconstructed state-space trajectory that smoothly transits from the polarized to the basal activity state, without the transient state-space trapping that was characteristic for the memory state emerging from the dynamical "ghost" (compare Figure 3G bottom to 2F, movie S4). The absence of memory in EGFR<sup>mCitrine</sup> phosphorylation was also reflected in absence of transient memory in morphological changes after stimulus removal (Figure 3H). In the MCF10A migration assay, cells directly switched to RW migration pattern upon gradient wash-out with Lapatinib, as shown through the directionality quantification after gradient removal (Figures 3I,J; movie S5). Equivalent single-cell motility trajectories could be mimicked with the PB(t)RW simulation, where the bias duration corresponded to the duration of the gradient (Figures S4I,E). This shows that the transient memory arising from a metastable "ghost" signaling state is a core dynamical feature underlying transient memory in directional motility, and cannot be explained with slow relaxation kinetics in receptor dephosphorylation.

#### **4 Molecular working memory enables cells to navigate in dynamic chemoattractant fields**

To test whether the identified memory enables cellular navigation in environments where signals are disrupted but also change over time and space, we subjected cells in the simulations



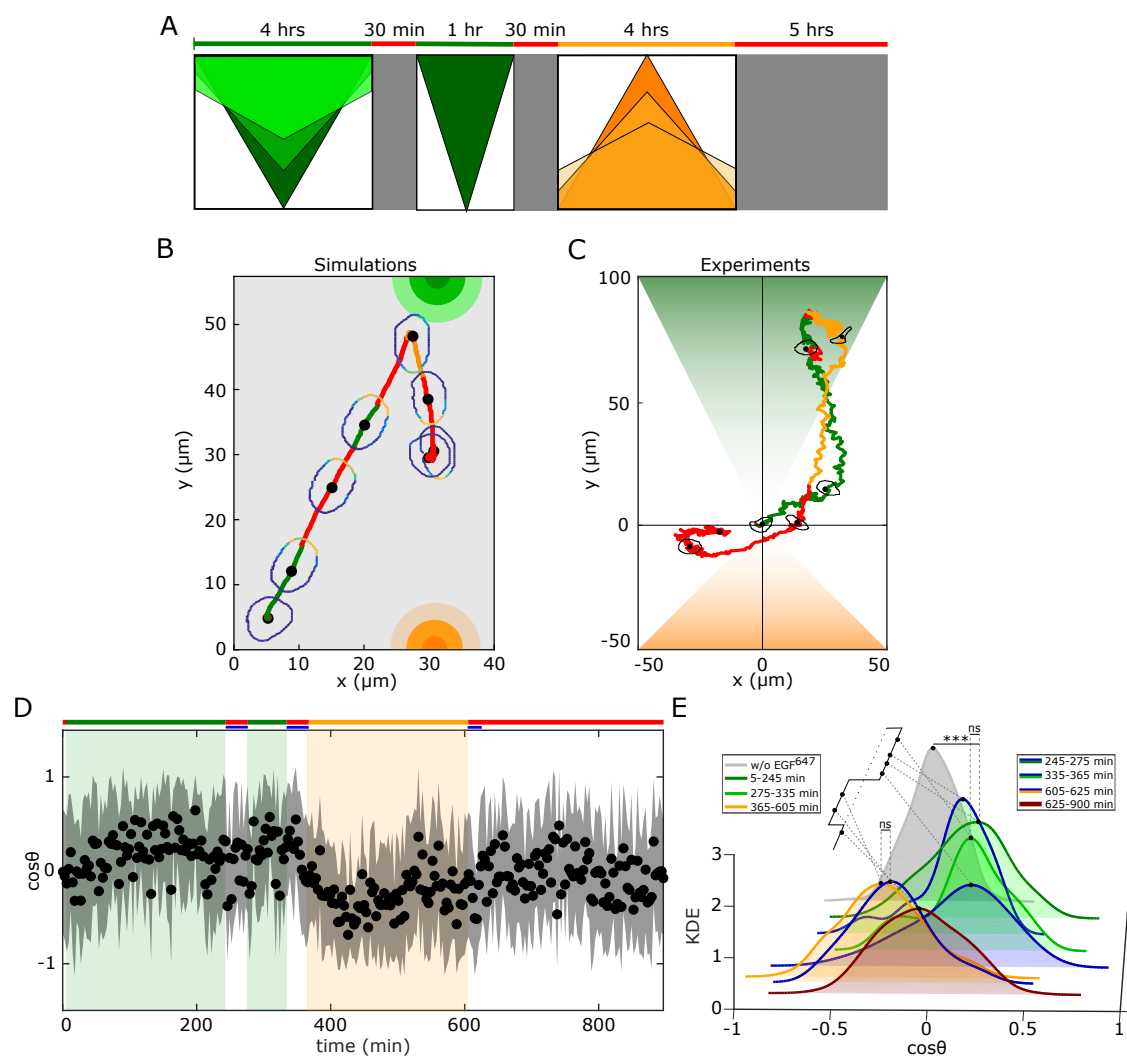

**Figure 4. History-dependent single-cell migration in changing chemoattractant field.** **A**, Scheme of dynamic spatial-temporal growth factor field implemented in the simulations and experiments. Green(orange)/red: gradient presence/absence. **B**, *In silico* cellular response to the sequence of gradients as depicted in **A**, showing changes in EGFR activity, cellular morphology and respective motility trajectory over time. Trajectory color coding corresponding to that in **(A)**, cell contour color coding with respective  $E_p$  values as in Figure 1E. Cell size is magnified for better visibility. See also movie S6. **C**, Representative MCF10A single-cell trajectory and cellular morphologies at distinct time-points, when subjected to dynamic EGF<sup>647</sup> gradient field as in **A**. Trajectory color coding corresponding to that in **A**. See also movie S8. **D**, Projection of cells' relative turning angles ( $\cos\theta$ ) depicting their orientation towards the respective localized signals. Mean $\pm$ s.d. from  $n=12$ ,  $N=5$  is shown. Data in Figure S5E. **E**, Corresponding kernel density estimates (intervals and color coding in legend). p-values: \* \* \*,  $p \leq 0.001$ , ns: not significant, KS-test. See also Figure S5.

and experiments to a changing growth factor field. The field was generated by a sequence of 265  
signals, starting with a dynamic gradient whose steepness changed over time, that was tem- 266  
porary disrupted for a time interval shorter than the interval of memory in cell polarization, 267  
followed by a second static gradient in the same direction, that after an equivalent disruption 268  
period was followed by a third dynamic gradient in the opposite direction (Figure 4A). The 269  
*in silico* migration simulations showed that the cell can sense the initial dynamic gradient and 270  
polarizes in the direction of maximal attractant concentration, resulting in directed migration 271  
(Figure 4B, Figure S5A, movie S6). The simulations also predicted that the memory of the pre- 272  
viously encountered signal localization enables maintaining robust directional migration even 273  
when the signal was disrupted, while still remaining sensitive to the newly emerging signal 274  
from the opposite direction. In the simulation, the *in silico* cell rapidly adapted the orientation 275  
when encountering the third signal with opposite localization, demonstrating that the proposed 276  
mechanism can also account for prioritizing newly encountered signals. Such a dynamic mem- 277  
ory which enables information of previous signals to be temporally maintained while retaining 278  
responsiveness to upcoming signals and thereby manipulate the stored information, in neuronal 279  
networks is described as a working memory (Atkinson and Shiffrin, 1968). On the other hand, 280  
the simulations also showed that the long-term memory resulting from organization in the stable 281  
inhomogeneous steady state regime, hindered cellular adaptation to a changing gradient field. 282  
The initial dynamic gradient shifted the system to the stable polarization steady state where it 283  
was maintained in a long-term, such that sensitivity to upcoming signals from the same direc- 284  
tion was hindered. Even more, in the simulations, the cell could not resolve the conflicting 285  
information from a subsequent gradient from the opposite direction as the signals induced high 286  
receptor activity on the opposed cell sides, resulting in ending the migration (Figures S5B,C, 287  
movie S7). 288

We next tested these predictions experimentally, by establishing an equivalent dynamic 289

EGF<sup>647</sup> spatial-temporal field in a controlled manner in the microfluidic chamber, and quanti- 290  
fied the migratory profile of MCF10A cells (Figure S5D). The MCF10A cells sensed the initial 291  
dynamic gradient field and migrated in the direction of the largest chemoattractant concentra- 292  
tion, maintaining the directionality even when the signal was temporary disrupted. Despite the 293  
memory in cell polarization, cells remained responsive and adapted the duration of directional 294  
migration when presented with a second static gradient from the same direction, and subse- 295  
quently prioritized the third, newly encountered signal with opposed orientation (exemplary 296  
trajectory in Figure 4C, movie S8, Figure S5E). The temporal memory in directional migration 297  
as well as the continuous adaptation of MCF10A cells to novel cues was also reflected in the 298  
projection of the cell's relative turning angles (Figure 4D), whereas the respective KDE dis- 299  
tributions derived from the subsequent time-intervals of gradient presence/absence corroborate 300  
that cells maintain the same migration characteristics within the memory intervals as during the 301  
gradient phase (Figure 4E). These results demonstrate that cells navigate in changing gradient 302  
fields by utilizing a molecular mechanism of working memory that is an intrinsic feature of 303  
receptor tyrosine kinase networks. 304

## Discussion 305

Our data establishes that mammalian cells use a mechanism of working memory to navigate in 306  
complex environments where the chemical signals are disrupted or vary over time and space. 307  
Even though persistent migration of eukaryotic cells in absence of signals was previously ob- 308  
served (Skoge et al., 2014; Albrecht and Petty, 1998; Prentice-Mott et al., 2016), its underlying 309  
mechanism and the implications for navigation in changing environments have not been elu- 310  
cidated. The mechanism of transient memory we report here is realized on a molecular level, 311  
by storing information about direction of previously encountered signals through maintaining 312  
a prolonged polarized phosphorylation state of receptor tyrosine kinases. Dynamically, the 313

prolonged polarized state emerges for organization of receptor networks at criticality, where a 314  
slow-escaping remnant from the attractor state or a dynamical "ghost" is generated. The "ghost" 315  
maintains the system away from steady state, suggesting that in migrating cells, the information 316  
about previously encountered signals can be encoded in the transient state-space trajectories 317  
rather than the steady-states of the protein interaction network. Our simulations and migration 318  
experiments show that this encoding via transient states is necessary to ensure the ability of cells 319  
to adapt to changes in the external environment, while maintaining memory of previous signals. 320  
Our work furthermore suggest that this general mechanism of a system poised at criticality can 321  
explain a wide range of biologically relevant scenarios, from the integration of temporally and 322  
spatially varying signals, to how extracellular information is transformed into guidance cues for 323  
memory-directed migration. Memory-guided navigation is advantageous when migration must 324  
be realized over long and complex trajectories through dense tissues where the chemical cues 325  
are disrupted or only locally organized. 326

For neuronal networks, short-term memory is a main requirement to integrate temporal 327  
dependencies from changing signals (Hochreiter and Schmidhuber, 1997; Maass et al., 2000). 328  
We have demonstrated here that the transient memory in cell polarization and therefore the 329  
capabilities of cells to navigate in a complex environment are an emergent feature of receptor 330  
networks organized at criticality, and cannot be explained using computations with stable states. 331  
It would be of interest to study whether receptor networks are self-organized at criticality, or 332  
these features arose through evolution as a means for optimizing the computational capabilities 333  
of cells. The identification of a molecular working memory also opens avenues of research 334  
in the single-cell migration and tissue homeostasis to study whether cells can integrate and 335  
interpret even sub-threshold environmental signals, leading to release of cells from a tissue and 336  
long-distance single cell migration, as during cancer metastasis. 337

## Acknowledgments

338

The authors thank Angel Stanoev for initial analysis of the EGFR polarity model, critical discussion during the project, as well as valuable comments on the manuscript, Manish Yadav and Monika Scholz for critical reading of the manuscript and valuable suggestions, and Frédéric Paquin-Lefebvre for valuable suggestions on the realization of the reaction-diffusion simulations. All of the experiments were carried in the lab of Philippe Bastiaens, and we are particularly grateful for the opportunity to be part of that engaging and critical community where we could learn and develop this project. We especially thank P. Bastiaens for numerous critical discussion and suggestions that were crucial throughout the project, as well as for detailed comments that significantly helped us to improve the manuscript. **Data and code availability:** The data can be obtained from the corresponding author upon reasonable request. The codes will be made publicly available upon acceptance. **Funding:** The project was funded by the Max Planck Society, partially through the Lise Meitner Excellence Program.

339  
340  
341  
342  
343  
344  
345  
346  
347  
348  
349  
350

## Author contributions

351

A.K. conceptualized and supervised the project; A.P.N. and A.K. developed the theoretical description; A.P.N. performed the analytical and numerical analysis; A.D. performed most of the experiments with help of A.P.N.; A.D., A.P.N. and R.L. analyzed the data. A.K. wrote the manuscript with help of A.D., A.P.N. and R.L.

352  
353  
354  
355

## Competing Interests statement

356

The authors declare no competing interests.

357

## 5 Materials and Methods 358

### 5.1 Cell Culture 359

MCF7 cells (sex: female, ECACC, Cat. No. 86012803) were grown at 37°C and 5% CO<sub>2</sub> 360  
in Dulbecco's Eagle's medium (DMEM) (PAN-Biotech, Germany), supplemented with 10% 361  
inactivated Fetal Calf Serum (FCS) (Sigma-Aldrich), 100 ng ml<sup>-1</sup> L-Glutamine, 0.5 mg ml<sup>-1</sup> 362  
non-essential amino acids, 100 µg ml<sup>-1</sup> penicillin and 100 µg ml<sup>-1</sup> streptomycin (PAN-Biotech, 363  
Germany). Serum starvation was performed by culturing the cells in DMEM supplemented with 364  
0.5% FCS, 100 µg ml<sup>-1</sup> penicillin and 100 µg ml<sup>-1</sup> streptomycin (PAN-Biotech, Germany). 365  
MCF10A cells (sex: female, ATCC-CRL 10317) were grown at 37°C and 5% CO<sub>2</sub> in Mammary 366  
Epithelial Cell Growth Basal medium (MEBM from Lonza Pharma & Biotech), supplemented 367  
with 5% Horse Serum (HS) (Invitrogen), 20 ng mL<sup>-1</sup> EGF (Sigma-Aldrich), 0.5 mg mL<sup>-1</sup> hy- 368  
drocortisone (Sigma-Aldrich), 100 ng ml<sup>-1</sup> cholera toxin (Sigma-Aldrich), 10 µg mL<sup>-1</sup> insulin 369  
(Sigma-Aldrich), 100 µg mL<sup>-1</sup> penicillin and 100 µg mL<sup>-1</sup> streptomycin. Serum starvation was 370  
performed by culturing the cells in the DMEM supplemented with 0.5% HS, 0.5 mg mL<sup>-1</sup> hy- 371  
drocortisone (Sigma-Aldrich), 100 ng ml<sup>-1</sup>, cholera toxin (Sigma-Aldrich) 100 µg mL<sup>-1</sup> peni- 372  
cillin and 100 µg mL<sup>-1</sup> streptomycin. MCF7 and MCF10A cells were authenticated by Short 373  
Tandem Repeat (STR) analysis and did not contain DNA sequences from mouse, rat and ham- 374  
ster (Leibniz-Institut DSMZ). Cells were regularly tested for mycoplasma contamination using 375  
MycoAlert Mycoplasma detection kit (Lonza). 376

### 5.2 Transfection and cell seeding 377

For EGFR<sup>mCitrine</sup> polarization experiments, 2.5 × 10<sup>5</sup> MCF7 cells were seeded per well in a 6- 378  
well Lab-Tek chamber (Nunc) until 80% confluence was reached. After 9-10 h of seeding, tran- 379  
sient transfection was performed with a total of 1 µg of plasmids (EGFR<sup>mCitrine</sup>, PTB<sup>mCherry</sup> 380  
and cCbl<sup>BFP</sup> at ratio 4:3:4 by mass) using FUGENE6 (Roche Diagnostics) transfection reagent 381

and Opti-MEM (Gibco - Thermo Fisher Scientific) according to manufacturer's procedure. All 382  
plasmids were generously provided by Prof. P. Bastiaens, MPI of Molecular Physiology, Dort- 383  
mund. Cells were incubated for 7-8 h to allow the expression of the transfected proteins prior 384  
to experiments. To detach the cells, the growth media was discarded and cells were washed 385  
once with DPBS (PAN Biotech) before adding 100  $\mu$ L Accutase (Sigma-Aldrich). After 10 min 386  
incubation period at 37°C and 5 % CO<sub>2</sub>, fresh growth media was added, and the cell density and 387  
viability was measured using cell counter (Vi-CELL XR Cell Viability Analyzer System). After 388  
spinning down, the cells were diluted to  $10 \times 10^6$  cells/ml. The M04-G02 microfluidic gradient 389  
plates (Merck Chemicals) were primed for usage by flowing cell culture growth media through 390  
the cell chamber for 5 min and cells were subsequently seeded according to manufacturer's 391  
instructions. 392

For migration experiments with uniform *EGF*<sup>647</sup> stimulation, 6-well Lab-Tek plates were 393  
coated with Collagen (Sigma-Aldrich) in 0.1 M Acetic acid (Sigma-Aldrich) for MCF7 394  
(100  $\mu$ g cm<sup>-2</sup>), and Fibronectin (Sigma-Aldrich) in Phosphate-Buffered Saline (DPBS) (PAN- 395  
Biotech) for MCF10A cells (2  $\mu$ g mL<sup>-1</sup>), and stored in incubator at 37°C overnight for evapo- 396  
ration. Excessive media was removed and the wells were washed with DPBS before seeding 397  
cells. MCF7 cells were seeded and transfected as described above. In the case of MCF10A 398  
cells,  $1 \times 10^5$  cells per well were used for seeding. For migration experiments with gradient 399  
*EGF*<sup>647</sup> stimulation, MCF7 cells were transferred to the coated M04-G02 microfluidic gradient 400  
plates as described above. Before seeding, MCF10A cells were detached from 6 well Lab-Teks 401  
by discarding the growth media and washing once with DPBS (PAN Biotech) before adding 402  
100  $\mu$ L Accutase (Sigma-Aldrich). After 20 – 30min incubation period at 37°C and 5 % CO<sub>2</sub>, 403  
fresh cell growth media was added, and the cell density and viability were measured using a 404  
cell counter (Vi-CELL XR Cell Viability Analyzer System). After spinning down, the cells 405  
were diluted to  $2 \times 10^6$  cells/ml, and subsequently seeded in the microfluidic plates according 406

to manufacturer's instructions. 407

### 5.3 Reagents 408

For gradient quantification, Fluorescein (Sigma Aldrich) was dissolved in Dulbecco's modified 409  
Eagle's medium (with 25 mM HEPES, without Phenol Red) (PAN Biotech). Imaging media: 410  
DMEM without Phenol Red was mixed with 25 mM HEPES. For nuclear staining, 20 mM 411  
Hoechst 33342 (Thermo Fisher Scientific) was mixed with DPBS and diluted to 2  $\mu$ M working 412  
concentration. EGFR inhibitor Lapatinib (Cayman Chemical, Ann Arbor, MI) was solubilized 413  
in DMSO (Thermo Fisher Scientific) to a stock concentration of 5 mM and stored at -20°C. 414

### 5.4 Confocal and wide-field microscopy 415

Confocal images were recorded using a Leica TCS SP8i confocal microscope (Leica Microsys- 416  
tems) with an environment-controlled chamber (Life Imaging Services) maintained at 37°C 417  
and HC PL APO 63x/1.2 N.A / motCORR CS2 water objective (Leica Microsystems) or a 418  
HC PL FLUOTAR 10x/0.3 N.A. dry objective (Leica Microsystems). mCitrine, mCherry and 419  
Alexa647 were excited with a 470 nm-670 nm pulsed white light laser (Kit WLL2, NKT Pho- 420  
tonics) at 514 nm, 561 nm and 633 nm, respectively. BFP and Hoechst 33342 (Thermo Fisher 421  
Scientific) were excited with a 405 nm diode laser. The detection of fluorescence emission 422  
was restricted with an Acousto-Optical Beam Splitter (AOBS): BFP (425 nm-448 nm), Hoechst 423  
33342 (425 nm-500 nm), mCitrine (525 nm-551 nm), mCherry (580 nm-620 nm) and Alexa647 424  
(655 nm-720 nm). Transmission images were recorded at a 150-200% gain. To suppress laser 425  
reflection, Notch filter 488/561/633 was used whenever applicable. When using the dry ob- 426  
jective for migration experiments, the pinhole was set to 3.14 airy units and 12-bit images of 427  
512x512 pixels were acquired in frame sequential mode with 1x frame averaging. When using 428  
the water objective for polarization experiments, the pinhole was fixed (1.7 airy units) for all 429



channels. The Leica Application Suite X (LAS X) software was used. 430

Wide field images were acquired using an Olympus IX81 inverted microscope (Olympus 431  
Life Science) equipped with a MT20 illumination system and a temperature controlled  $CO_2$  in- 432  
cubation chamber at  $37^\circ C$  and  $5\% CO_2$ . Fluorescence and transmission images were collected 433  
via a 10x/0.16 NA air objective and an Orca CCD camera (Hamamatsu Photonics). Hoechst 434  
33342 fluorescence emission was detected between 420 nm-460 nm via DAPI filter, mCitrine 435  
fluorescence emission between 495 nm-540 nm via YFP filter and Alexa647 fluorescence emis- 436  
sion between 705 nm-745 nm via Cy5 filter. The xCellence (Olympus) software was used. 437

## 5.5 Gradient establishment for polarization and migration experiments 438

The CellAsic Onix Microfluidic Platform (EMD Millipore) was used for gradient cell migration 439  
and  $EGFR^{mCitrine}$  phosphorylation polarization experiments. For  $EGFR^{mCitrine}$  phosphoryla- 440  
tion polarization experiments, 1 h gradient stimulation was established using CellASIC ONIX2 441  
software as follows. (i) Pre-stimulus: Imaging media was flowed from well groups 3 and 4 (Cel- 442  
lAsic Onix Manual - [www.merckmillipore.com/](http://www.merckmillipore.com/)) at low pressure (2.5 kPa) for 5 min. (ii) Gra- 443  
dient establishment: After closing well group 3, pre-loaded  $EGF^{647}$  ( $10 \text{ ng mL}^{-1}$ ) was flowed 444  
through well group 2 and imaging media from well group 4 at high pressure (15 kPa) for 15 min 445  
(iii) Gradient maintenance: The pressure was reduced to 10 kPa for 45 min. (iv) Washout: Af- 446  
ter closing well groups 2 and 4, imaging media was flowed from well groups 3 and 5 at high 447  
pressure (15 kPa) for 15 min and maintained at low pressure (7 kPa) for 165 min. For single 448  
gradient migration experiments, this protocol was modified as follows: in step (iii), gradient 449  
maintenance was done for 285 min. In step (iv), maintenance was at low pressure for 585 min. 450  
 $30 \text{ ng mL}^{-1} EGF^{647}$  was used. For polarization experiments with inhibitor, the same protocol 451  
as for polarization experiments was used, except well group 3 and 5 were filled with  $1 \mu M$  La- 452  
patinib solution and in step (i) well group 3 was kept closed. For single cell gradient migration 453

experiment with inhibitor, 3  $\mu\text{M}$  Lapatinib was used. 454

For migration experiments under subsequent gradient stimuli / gradient quantification, the 455 following changes in the steps were used : (ii) well group 2 with 30  $\text{ng mL}^{-1}$  EGF<sup>647</sup> / 2.5  $\mu\text{M}$  456 Fluorescein was used. (iii) The gradient maintenance was done for 225 min. (iv) Washout: 457 imaging media was flowed from well groups 3 and 4 at high pressure (15 kPa) for 15 min and 458 maintained at low pressure (7 kPa) for 15 min. (v) Second gradient establishment: After closing 459 well group 3, EGF<sup>647</sup> (30  $\text{ng mL}^{-1}$ ) / 2.5  $\mu\text{M}$  Fluorescein was flowed from well group 2 and 460 imaging media from well group 4 at high pressure (15 kPa) for 15 min. (vi) The second gradient 461 thus formed was maintained by reducing the pressure to 10 kPa for 45 min. (vii) Washout: 462 imaging media was flowed from well groups 3 and 4 at high pressure (15 kPa) for 15 min 463 and maintained at low pressure (7 kPa) for 15 min. (viii) Third gradient establishment: After 464 closing well group 4, EGF<sup>647</sup> (30  $\text{ng mL}^{-1}$ ) / 2.5  $\mu\text{M}$  Fluorescein was flowed from well group 465 5 and imaging media from well group 3 at high pressure (15 kPa) for 15 min. (ix) The third 466 reversed gradient was maintained by reducing the pressure to 10 kPa for 225 min. (x) Washout: 467 imaging media was flowed from well groups 3 and 4 at high pressure (15 kPa) for 15 min and 468 maintained at low pressure (7 kPa) for 285 min. 469

## 5.6 Imaging *EGFR<sup>mCitrine</sup>* phosphorylation polarization and single cell 470 migration 471

Transfected MCF7-EGFR<sup>mCitrine</sup> cells transferred to M04G-02 gradient plates as described 472 above were incubated for at least 3 h, followed by serum starvation for at least 6 h before imag- 473 ing. Existing cell media was substituted right before imaging with imaging media. Confocal 474 imaging for multiple positions at 1 min time interval using adaptive auto-focus system and the 475 water objective was performed concurrently during the duration of the experiment using the 476 Leica TCS SP8i. 477

For migration experiments under uniform EGF<sup>647</sup> stimulation, confocal laser scanning microscopy / transmission imaging of live MCF7-EGFR<sup>mCitrine</sup> / MCF10A cells was done on a Leica TCS SP8i or Olympus IX81 for multiple positions at 3 min and 2 min time interval respectively, using the 10x dry objective for 14 hours.

## 5.7 EGF<sup>647</sup> / Fluorescein gradient quantification

hEGF<sup>647</sup> was generated in the lab of Prof. P. Bastiaens, MPI of molecular Physiology, Dortmund, using the His-CBD-Intein-(Cys)-hEGF-(Cys) plasmid (Sonntag et al., 2014), kindly provided by Prof. Luc Brunsveld, University of Technology, Eindhoven. Human EGF was purified from *E. coli* BL21 (DE3), N-terminally labeled with Alexa647-maleimide as described previously (Sonntag et al., 2014) and stored in PBS at -20°C. To quantify the spatial extent of the EGF<sup>647</sup> / Fluorescein gradient, gradients were generated following the protocol described in sub-section 5.5 in plates without cells or matrix coating. Confocal images of Alexa647 / GFP channel were acquired at 1 min interval. A rectangular region of interest (including the perfusion channels and the culture chamber) was used to obtain an averaged pixel intensity profile using FIJI at each time point. This spatial profile was averaged across multiple experiments and then scaled with the mean intensity value in the perfusion channel, which corresponds to the applied EGF<sup>647</sup> / Fluorescein concentration.

## 5.8 Quantifying EGFR<sup>mCitrine</sup> phosphorylation in single cells

To quantify plasma membrane EGFR<sup>mCitrine</sup> phosphorylation in live MCF7-EGFR<sup>mCitrine</sup> cells, single cell masks were obtained from the EGFR<sup>mCitrine</sup> channel at each time-point using FIJI (<https://imagej.net/Fiji>). All pixels within the obtained boundary were radially divided into 2 segments of equal areas (Stanoev et al., 2018), and the outer segment was taken to represent the plasma membrane. For the kymograph analysis, at each time point, the plasma membrane

segment was divided into 4 quadrants in anti-clockwise direction, and each was divided into 501  
 5 spatial bins (Figure 2A). The fraction of phosphorylated EGFR<sup>mCitrine</sup> in each bin,  $i$  was 502  
 estimated as: 503

$$EGFR_p^i(t) = \frac{PTB_{PM}^i(t)/(PTB_T(t) - PTB_{endo}(t))}{EGFR_{PM}^i(t)/EGFR_T(t)} \quad (1)$$

where  $PTB_{PM}^i(t)$  and  $EGFR_{PM}^i(t)$  are respectively the PTB<sup>mCherry</sup> and EGFR<sup>mCitrine</sup> 504  
 fluorescence at  $i^{th}$  plasma membrane bin,  $PTB_T(t)$  and  $EGFR_T(t)$  - respective total fluores- 505  
 cence in the whole cell,  $PTB_{endo}(t)$  - the PTB<sup>mCherry</sup> fluorescence on vesicular structures in 506  
 the cytoplasm. Endosomal structures were identified from the cytosol by intensity thresholding 507  
 (1.5 s.d. percentile) and PTB<sup>mCherry</sup> fluorescence from these structures was subtracted from the 508  
 $PTB_T(t)$ , to correct for the PTB<sup>mCherry</sup> fraction bound to the phosphorylated EGFR<sup>mCitrine</sup> on 509  
 endosomes. 510

Temporal profile of the fraction of phosphorylated EGFR<sup>mCitrine</sup> on the plasma membrane 511  
 was obtained using: 512

$$EGFR_p(t) = \frac{\sum_{i=1}^{20} PTB_{PM}^i(t)}{(PTB_T(t) - PTB_{endo}(t))} \quad (2)$$

$$\frac{\sum_{i=1}^{20} EGFR_{PM}^i(t)}{(EGFR_T(t))}$$

and then normalized as: 513

$$EGFR_p(t) = \frac{EGFR_p(t) - \langle EGFR_p \rangle_{t \in [0, 5min]}}{\max_t(EGFR_p(t)) - \langle EGFR_p \rangle_{t \in [0, 5min]}} \quad (3)$$

with  $\langle \rangle$  being the temporal average in the pre-stimulation interval  $t \in [0, 5min]$ . The 514  
 fraction of liganded receptor was calculated using: 515

$$EGF - EGFR(t) = \frac{EGF_{PM}}{EGFR_{PM}}(t) \quad (4)$$

To classify single cells into non-activated, activated (polarized EGFR<sup>mCitrine</sup> phosphorylation) and pre-activated (uniformly distributed EGFR<sup>mCitrine</sup> phosphorylation) upon gradient EGF<sup>647</sup> stimulation (Figure S2A, B), the following method was applied. To identify pre-activated cells, a Gaussian Mixture Model (GMM) was fitted to the histogram of  $(EGFR_p^i)_{t \in [0, 5min]}$  values from all the analysed cells, and the intersection point between the two normal distributions was identified. If more than 30% of the  $(EGFR_p^i)_{t \in [0, 5min]}$  pixel intensity values for any cell lie above the intersection point, the cell is classified as pre-activated. To distinguish between the non-activated and activated cells in the remaining population, average EGFR<sup>mCitrine</sup> phosphorylation value ( $EGFR_p$ ) per cell was estimated during the pre-stimulation ( $t \in [0, 5min]$ ) and the stimulation period ( $t \in [5min, 65min]$ ) ( $\langle EGFR_p \rangle_{t \in [0, 65]}$ ) from the temporal EGFR<sup>mCitrine</sup> phosphorylation profiles. Histogram of the respective  $EGFR_p$  values was again fitted with a GMM model. All cells with an average  $\langle EGFR_p \rangle_{t \in [0, 65]}$  value lying below the intersection point were considered to be non-activated, whereas those above - activated.

The average of the spatial projection of the fraction of phosphorylated EGFR<sup>mCitrine</sup> from single-cell kymographs (Figure S2C) was generated from the 20 (from total of 21 cells) that were polarized in the direction of the EGF<sup>647</sup> gradient. For each cell, a temporal average of  $EGFR_p$  per bin was calculated for the duration of the gradient ( $t \in [5min, 65min]$ ) and the bin with the maximal  $EGFR_p$  value was translated to  $\pi$ . The profiles were then smoothed using a rolling average with a window of 7 bins. The resulting profiles were then averaged over all cells and mean $\pm$ s.d. is shown.

## 5.9 Estimating memory duration in EGFR<sup>mCitrine</sup> phosphorylation polarization

The duration of memory in EGFR<sup>mCitrine</sup> phosphorylation polarization in single cells was estimated from the temporal profile of the fraction of plasma membrane area with high EGFR<sup>mCitrine</sup>

phosphorylation during and after gradient removal (Figures 2D,E). For this, the single-cell ky- 540  
mographs were normalized to a maximal value of 1 using 541

$$EGFR_p^i(t) = \frac{EGFR_p^i(t) - \langle EGFR_p \rangle_{t \in [0,5min]}}{\max_t(EGFR_p(t)) - \langle EGFR_p \rangle_{t \in [0,5min]}} \quad (5)$$

yielding the value of phosphorylated EGFR<sup>mCitrine</sup> per bin  $i$  per time point  $t$ . Using the mean of 542  
 $EGFR_p + s.d.$  over the whole experiment duration as a threshold, all  $EGFR_p^i(t)$  lying above 543  
the threshold were taken to constitute the area of polarized EGFR<sup>mCitrine</sup> phosphorylation. To 544  
account for different bin sizes, at each timepoint, the area of all bins with  $EGFR_p$  above the 545  
threshold was summed and divided by the respective total cell area, yielding the temporal evo- 546  
lution of the fraction of polarized cell area (FPA) (Figure 2D). The end of the memory duration 547  
per cell was identified as the time point at which  $FPA_{per-cell} < (FPA_{average} - s.d.)$  in 3 548  
consecutive time points. 549

## 5.10 Quantifying morphological changes in response to EGF<sup>647</sup> in exper- 550 iments and simulations 551

Morphological changes of polarized cells were quantified using the solidity (Figure 2H) of each 552  
cell at each time point and the directed protrusive area towards and away from the gradient 553  
(Figure 1 G,H; 2G). The solidity  $\sigma$  is the ratio between the cell's area  $A_{cell}$  and the area of the 554  
convex hull  $A_{convex}$  ( $\sigma = \frac{A_{cell}}{A_{convex}}$ ). The memory duration in cell morphology was calculated 555  
from the single-cell solidity profiles, and corresponds to the time-point at which the solidity is 556  
below mean-s.d. estimated during gradient presence. The directed cell protrusion area was esti- 557  
mated by comparing single cell masks at two consecutive time points. To reduce noise effects, 558  
the masks were first subjected to a 2D Gaussian filtering using the *filters.gaussian* function 559  
from the *scipy* python package. Protrusions were considered if the area change was greater 560  
than 10 pixels or  $1.2\mu m^2$  per time point. The front and the back of the cells were determined by 561

identifying an axis that runs perpendicular to the gradient and through the cell nucleus of the initial time point. The directed cell protrusion area was then obtained using  $\frac{A_{prot,front}}{A_{front}} - \frac{A_{prot,back}}{A_{back}}$ . The final profiles of directed protrusive area were smoothed using 1D Gaussian filtering with the *filters.gaussian\_filter1d* function from the *scipy* python package. For the equivalent quantification from the simulations, the same procedures were applied without an area threshold. The memory duration was estimated as the time point at which the directed protrusive area crosses zero after the gradient removal.

## 5.11 Quantification of single-cell migration and duration of memory in migration

Single cell migration trajectories were extracted using Trackmate (Tinevez et al., 2017) in Fiji (Schindelin et al., 2012) using Hoechst 33342 / transmission channel. From the positional information (x and y coordinates) of individual cell tracks, quantities such as Motility, Directionality and  $\cos \theta$  were extracted using custom made Python code (Python Software Foundation, versions 3.7.3, <https://www.python.org/>). Directionality was calculated as displacement over total distance and statistical significance was tested using two-sided Welch's t-test. To quantify the memory duration in directed single-cell migration, the Kernel Density Estimate (KDE) from  $\cos \theta$  quantification in the continuous absence of EGF<sup>647</sup> (uniform case, between 250 min-300 min) was compared with windowed KDE (5 time points moving window) from the gradient migration profile, using two sided Kolmogorov-Smirnov test.

To quantify the motility patterns of MCF10A cells in absence, uniform or gradient EGF<sup>647</sup> stimulation, we fitted the experimentally obtained single cell migration trajectories using modified Ornstein-Uhlenbeck process (mOU) (Uhlenbeck and Ornstein, 1930) that is defined by the Langevin equation for the velocity vector  $\nu$ :

$$\frac{d\nu(\mathbf{t})}{dt} = -\frac{1}{\tau} \cdot \nu(\mathbf{t}) + \frac{\sqrt{2D}}{\tau} \cdot (\xi(t) + b(t)) \quad (6)$$

where  $\xi(t)$  represents a white noise component,  $D$  is a diffusion coefficient characteristic of a Brownian motion,  $\tau$  is the persistence time and  $b(t)$  models the contribution of the time-dependent bias. The experimental data was fitted to obtain values of  $D$  and  $\tau$ . In order to estimate  $D$ , Mean Square Displacement (MSD) was calculated from the single cell tracks using  $MSD(t) = \langle |\mathbf{x}_i(t) - \mathbf{x}_i(0)|^2 \rangle$ , where  $\mathbf{x}_i(t)$  is the tracked position of  $i$ -th cell in the 2D plane,  $\langle \rangle$  is the average across all single cell tracks, and  $|\cdot|$  is the Euclidean distance (D. et al., 2005). To estimate  $D$ , the obtained MSD profile was fitted with a linear function ( $= 4Dt$ ). Goodness of Fit for the different experimental conditions: 0ng/ml EGF<sup>647</sup>,  $R^2 = 0.975$ ; for uniform 20ng/ml EGF<sup>647</sup> stimulation,  $R^2 = 0.995$ . In order to estimate  $\tau$ , Velocity Auto-Correlation Function  $VACF(t) = \langle \nu_i(t) \cdot \nu_i(0) \rangle$ , where  $\nu_i(t)$  is the measured velocity of  $i$ -th cell at time  $t$ , was fitted with a mono exponential function ( $= \phi_0 \cdot e^{-\frac{t}{\tau}}$ ). Goodness of Fit : for 0ng/ml EGF<sup>647</sup> case - Standard Error Of Estimate  $SEOE = 0.0261$ ; for uniform 20ng/ml EGF<sup>647</sup> stimulation case,  $SEOE = 0.0570$ . Fitted values: for 0ng/ml EGF<sup>647</sup> case,  $\tau = 11.105$ ,  $D = 0.425$ ; for uniform 20ng/ml EGF<sup>647</sup> stimulation case,  $\tau = 38.143$ ,  $D = 2.207$ ; bias  $b(t) = 0.134$ .

## 5.12 Reconstructing state-space trajectories from temporal EGFR<sup>mCitrine</sup> phosphorylation profiles

The state-space reconstruction in Figures 2F and 3G was performed using the method of time-delay. For a time series of a scalar variable, a vector  $x(t_i)$ ,  $i = 1, \dots, N$  in state-space in time  $t_i$  can be constructed as following



$$\mathbf{X}(t_i) = [x(t_i), x(t_i + \tau), \dots, x(t_i + (m - 1)\tau)] \quad (7)$$

where  $i = 1$  to  $N - (m - 1)\tau$ ,  $\tau$  is the embedding delay,  $m$  - is a dimension of reconstructed space (embedding dimension). Following the embedding theorems by Takens (Takens, 1980) and Sauer et al. (Sauer et al., 1991), if the sequence  $X(t_i)$  consists of scalar measurements of the state of a dynamical system, then under certain genericity assumptions, the time delay embedding provides a one-to-one image of the original set, provided  $m$  is large enough. The embedding delay was identified using the *timeLag* function (based on autocorrelation), the embedding dimension using the *estimateEmbeddingDims* function (based on the nearest-neighbours method), and the state-space reconstruction using the *buildTakens* function, all from the *nonlinearTseries* package in R (<https://cran.r-project.org/web/packages/nonlinearTseries/index.html>). Before state-space reconstructions, time series were smoothed using the *Savitzky-Golay* filter function in Python. For Figure 2F,  $\tau = 26$ ,  $d_e = 3$ ; for Figure 3G,  $\tau = 50$ ,  $d_e = 3$ .

## References and Notes

Albrecht, E. and Petty, H. R. (1998). Cellular memory: Neutrophil orientation reverses during temporally decreasing chemoattractant concentrations. *Proceedings of the National Academy of Sciences* *95*, 5039–5044.

Atkinson, R. and Shiffrin, R. (1968). Human memory: A proposed system and its control processes. *Physiology of Learning and Motivation* *2*, 89–195.

Baumdick, M., Bruggemann, Y., Schmick, M., Xouri, G., Sabet, O., Davis, L., Chin, J. W. and Bastiaens, P. I. (2015). EGF-dependent re-routing of vesicular recycling switches spontaneous phosphorylation suppression to EGFR signaling. *eLife* *4*, e12223.

Becherer, P., Morozov, A. N. and van Saarloos, W. (2009). Probing a subcritical instability with an amplitude expansion: An exploration of how far one can get. *Physica D: Nonlinear Phenomena* *238*, 1827–1840.

Beta, C., Amselem, G. and Bodenschatz, E. (2008). A bistable mechanism for directional sensing. *New J of Phys* *10*, 083015.

Bjorkelund, H., Gedda, L., Malmqvist, M. and Andersson, K. (2012). Resolving the EGF-EGFR interaction characteristics through a multiple-temperature, multiple-inhibitor, real-time interaction analysis approach. *Mol. Clin. Oncol.* *1*, 343–352.

Brueggemann, Y., Karajannis, L. S., Stanoev, A., Stallaert, W. and Bastiaens, P. I. H. (2021). Growth factor-dependent ErbB vesicular dynamics couple receptor signaling to spatially and functionally distinct Erk pools. *Science Signaling* *14*, eabd9943.

Chiasson-MacKenize, C. and McClatchey, A. I. (2018). EGFR-induced cytoskeletal changes drive complex cell behavior: The tip of the iceberg. *Science Signaling* *11*, eaas9473.

D., S., Mosler, S., Hagedorn, P., Larsen, N. and Flyvbjerg, H. (2005). Cell Motility as Persistent Random Motion: Theories from Experiments. *Biophysical J.* *89*, 912–931.

Foxman, E. F., Kunkel, E. J. and Butcher, E. C. (1999). Integrating Conflicting Chemotactic Signals: The Role of Memory in Leukocyte Navigation. *Journal of Cell Biology* *147*, 577–588.

Goryachev, A. B. and Pokhilko, A. V. (2008). Dynamics of CDC42 network embodies a Turing-type mechanism of yeast cell polarity. *FEBS Lett.* *582*, 1437–1443.

Halatek, J. and Frey, E. (2018). Rethinking pattern formation in reaction-diffusion systems. *Nature Physics* *14*, 507–514.

Hochreiter, S. and Schmidhuber, J. (1997). Long short-term memory. *Neural Comp.* *9*, 1735–1780.

Jilkine, A. and Edelstein-Keshet, L. (2011). A Comparison of Mathematical Models for Polarization of Single Eukaryotic Cells in Response to Guided Cues. *PLOS Computational Biology* *7*, 1–15.

Koseska, A., Volkov, E. and Kurths, J. (2013). Transition from amplitude to oscillation death via Turing bifurcation. *Phys Rev Lett* *111*, 024103.

Levchenko, A. and Iglesias, P. A. (2002). Models of eukaryotic gradient sensing: application to chemotaxis of amoebae and neutrophils. *Biophysical J* *82*, 50–63.

Levine, H., Kessler, D. A. and Rappel, W.-J. (2002). Directional sensing in eukaryotic chemotaxis: a balanced inactivation model. *PNAS* *103*, 9761–9766.

Maass, W., Natschlag, T. and Markram, H. (2000). Real-time computing without stable states: a new framework for neural computation based on perturbations. *Neural Comp.* *14*, 2531–2560.

Mori, Y., A., J. and Edelstein-Keshet, L. (2008). Wave-pinning and cell polarity from a bistable reaction-diffusion model. *Biophysical J.* *94*, 3684–3697.

Offterdinger, M., Georget, V., Girod, A. and Bastiaens, Philippe, I. (2004). Imaging phosphorylation dynamics of the epidermal growth factor receptor. *J Biol Chem.* *279*, 36972–81.

Paquin-Lefebvre, F., Xu, B., DiPietro, K. L., Lindsay, A. E. and Jilkin, A. (2020). Pattern formation in a coupled membrane-bulk reaction-diffusion model for intracellular polarization and oscillations. *Journal of Theoretical Biology* *497*, 110242.

Parent, C. A. and Devreotes, P. N. (1999). A cell's sense of direction. *Science* *284*, 765–770.

Prentice-Mott, H. V., Meroz, Y., Carlson, A., Levine, M. A., Davidson, M. W., Irimia, D., Charras, G. T., Mahadevan, L. and Shah, J. V. (2016). Directional memory arises from long-lived cytoskeletal asymmetries in polarized chemotactic cells. *Proceedings of the National Academy of Sciences* *113*, 1267–1272.

Reynolds, A., Tischer, C., Verveer, P., Rocks, O. and Bastiaens, P. (2003). EGFR activation coupled to inhibition of tyrosine phosphatases causes lateral signal propagation. *Nat Cell Biol* *5*, 447–453.

Ridley, A. and Hall, A. (1992). The small GTP-binding protein rho regulates the assembly of focal adhesions and actin stress fibers in response to growth factors. *Cell* *70*, 389–399.

Ridley, A. J., Schwartz, M. A., Burridge, K., Firtel, R. A., Ginsberg, M. H., Borisy, G., Parsons, J. T. and Horwitz, A. R. (2003). Cell Migration: Integrating Signals from Front to Back. *Science* *302*, 1704–1709.

Sauer, T., Yorke, J. and Casdagli, M. (1991). Embedology. *J. Stat. Phys.* *65*, 579.

Schindelin, J., Arganda-Carreras, I., Frise, E., Kaynig, V., Longair, M., Pietzsch, T., Preibisch, S., Rueden, C., Saalfeld, S., Schmid, B., Tinevez, J.-Y., White, D. J., Hartenstein, V., Eliceiri, K., Tomancak, P. and Cardona, A. (2012). Fiji: an open-source platform for biological-image analysis. *Nature Methods* *9*, 676–682.

Skoge, M., Yue, H., Erickstad, M., Bae, A., Levine, H., Groisman, A., Loomis, W. F. and Rappel, W.-J. (2014). Cellular memory in eukaryotic chemotaxis. *Proceedings of the National Academy of Sciences* *111*, 14448–14453.

Sonntag, M., Ibach, J., Nieto, L., Verveer, P. and Brunsveld, L. (2014). Site-Specific Protection and Dual Labeling of Human Epidermal Growth Factor (hEGF) for Targeting, Imaging, and Cargo Delivery. *Chemistry - a European Journal* *20*, 6019–6026.

Stanoev, A., Mhamane, A., Schuermann, K., Grecco, H., Stallaert, W., Baumdick, M., Brüggemann, Y., Joshi, M., Roda-Navarro, P., Fengler, S., Stockert, R., Roßmannek, L., Luig, J., Koseska, A. and Bastiaens, P. (2018). Interdependence between EGFR and Phosphatases Spatially Established by Vesicular Dynamics Generates a Growth Factor Sensing and Responding Network. *Cell Systems* *7*, 295–309.e11.

Stanoev, A., Nandan, A. P. and Koseska, A. (2020). Organization at criticality enables processing of time-varying signals by receptor networks. *Mol Syst Biol* *16*, e8870.

Strogatz, S. H. (2018). *Nonlinear dynamics and chaos: with applications to physics, biology, chemistry, and engineering*. CRC Press.

Svensson, C., Medyukhina, A., Belyaev, I., Al-Zaben, N. and Figge, M. (2017). Untangling cell tracks: Quantifying cell migration by time lapse image data analysis. *Cytometry Part A, J. of Quantitative Cell Science* *93A*, 357–370.

Takens, F. (1980). "Detecting strange attractors in turbulence", in "Dynamical systems and turbulence", Editors David Rand and Lai-Sang Young. Springer Nature.

Tinevez, J.-Y., Perry, N., Schindelin, J., Hoopes, G. M., Reynolds, G. D., Laplantine, E., Bednarek, S. Y., Shorte, S. L. and Eliceiri, K. W. (2017). TrackMate: An open and extensible platform for single-particle tracking. *Methods* *115*, 80–90.

Trong, P. K., Nicola, E. M., Goehring, N. W., Kumar, K. V. and Grill, S. W. (2014). Parameter-space topology of models for cell polarity. *New J of Physics* *16*, 065009.

Uhlenbeck, G. and Ornstein, L. (1930). On the theory of Brownian motion. *Phys. Rev.* *36*, 823–841.

Xiong, Y., Huang, C.-H., Iglesias, P. and Devreotes, P. N. (2010). Cells navigate with a local-excitation, global-inhibition-biased excitable network. *PNAS* *107*, 17079–17086.

Yang, L., Effler, J. C., Kutscher, B. L., Sullivan, S. E., Robinson, D. N. and Iglesias, P. A. (2008). Modeling cellular deformations using the level set formalism. *BMC Syst Biol* *2*, 1–16.
